# Supplementary material for: Undernutrition, Food Insecurity and Associated Factors among Adult HIV Positive people on HAART in Public Health Facility in Oromia Special Zone Surrounding Finfinne, Oromia, Ethiopia.
Source: Research Square preprint supplement (doi:10.21203/rs.3.rs-815780/v1), 2021-09-21
Supplement: Supplementary file 1 [file 4c6a9ca7a3549bbca873f8a0.docx]

**English Version Questionnaire**

**Instruction**

**Data collector**: This is first part (from Section I to IV) is filled by interview with the patient who started HAART and took at least for 3 month priority to involving in this study.

SECTION I. SOCIO­DEMOGRAPHIC AND ECONOMIC CHARACTERISTICS

| No | Questions | Coding Categories | Skip |
| --- | --- | --- | --- |
| Q101 | Age of the respondent | ________in year |  |
| Q102 | Sex of the respondent | 1.Male  2.Female |  |
| Q103 | Ethnicity | 1.Oromo  2.Amhara  3.Tigre  4.Gurage  5.Others specify _____ |  |
| Q104 | Marital status | 1.Married  2.Single  3.Divorced  4.Separated  5.Widowed  6.Others specify ____ |  |
| Q105 | Religion | 1.Orthodox  2.Muslim  3.Protestant  4.Wakefata/tu  5.others specify______ |  |
| Q106 | Educational status | 1.Illitrate  2.Read and write only  3.Primery (Grade 1-8)  4 secondary (Grade 9-12)  5. Diploma and above  6. others specify ______ |  |
| Q107 | With whom do you live | 1. Alone  2.Family  3. Parent |  |
| Q108 | Family size | ________in number |  |
| Q109 | Do you earn/make money by yourself | 0. No  1.Yes  99.Don’t know | Go To Q111 |
| Q110 | If YES toQ109 what is your average monthly in come | ________Birr/Month |  |
| Q111 | What is the monthly income on average of your household including your own | ________Birr/Month |  |
| Q112 | Are you receiving any money or support from any organization | 0. No  1.Yes  99.Don’t know | Go To Q114 |
| Q113 | IF YES to Q112, what type of Organization? | 1. Governmental  2.Non-governmental  3.Faith based organization  4.others specify_____ |  |
| Q114 | Are you receiving any food ration from any organization? | 0. No  1.Yes  99.Don’t know | Go To Q116 |
| Q115 | If YES to Q114, what type of Organization? | 1. Governmental  2.Non-governmental  3.Faith based organization  4.others specify_____ |  |
| Q116 | If YES to Q115, what type food you are receiving? | _____________ |  |
| Q117 | Does anyone else know about your HIV status? | 0. No  1.Yes  99.Don’t know |  |
| Q118 | If yes to Q117, who? (multiple response possible) | 1. Wife/Husband  2.Oun child  3.Parent  4.Brothers/Sisters  5.Relatives  6.Friends  7.Neighbors  98. others specify ______ |  |
| Q119 | Do you receive support from your family? | 0. No  1.Yes  99.Don’t know | Go To Q201 |
| Q120 | If YES to Q119, what kind of support you get from your family (multiple response possible) | 1.emotional/ psychological support  2.Financial support  3.Physical support  4. Food support  5 others specify _____ |  |
|  | **PART II. DIETARY RELATED INFORMATION** | |  |
| No | Questions | Coding categories | Skip |
| Q201 | During the previous 24-hours period (yesterday day and night), did you consume any of the following meals: | |  |
| Q201A | Any food before a morning meal | 0. No  1.Yes  99.Don’t know |  |
| Q201B | A morning meal | 0. No  1.Yes  99.Don’t know |  |
| Q201C | Any food between midday and evening meal | 0. No  1.Yes  99.Don’t know |  |
| Q201D | A midday meal | 0. No  1.Yes  99.Don’t know |  |
| Q201E | Any food between midday and evening meal | 0. No  1.Yes  99. Don’t know |  |
| Q201F | Any Evening meal | 0. No  1.Yes  99. Don’t know |  |
| Q201G | Any food after evening meal | 0. No  1. Yes 99. Don’t know |  |
| Q202 | During the previous 24-hours period (yesterday day and night), did you consume? | |  |
| Q202A | Bread, ’Ambasha’, rice noodles, biscuits, cookies, Enjera or any other foods made from millet, sorghum, maize, rice, wheat, barley, teff? | 0. No  1.Yes  99.Don’t know |  |
| Q202B | Any pumpkin, carrots, squash, or sweet potatoes that are yellow or orange inside? | 0. No  1.Yes  99.Don’t know |  |
| Q202C | Any white potatoes, white yams, manioc, ‘Adenguare’ or any other foods made from roots or tubers? | 0. No  1.Yes  99.Don’t know |  |
| Q202D | Any dark, green, leafy vegetables such as cauliflower, tomato, bean leaves, kale, spinach, pepper leaves, taro leaves and amaranth leaves and other vegetables | 0. No  1.Yes  99.Don’t know |  |
| Q202E | Any other vegetables? (i.e. tomato, onion, eggplant), including wild vegetables. | 0. No  1.Yes  99.Don’t know |  |
| Q202F | Any ripe mango, avocado, banana, pineapple, ripe papayas or orange? | 0. No  1.Yes  99.Don’t know |  |
| Q202G | Any other fruit? | 1.Yes  2.No 99.Don’t know |  |
| Q202H | Any beef, pork, lamp, goat, rabbit wild game, chicken, duck or other birds, liver, kidney, heart, or other organ meat. | 0. No  1.Yes  99.Don’t know |  |
| Q202I | Any eggs? | 0. No  1.Yes  99.Don’t know |  |
| Q202J | Any fresh or dried fish or shellfish? | 0. No  1.Yes  99.Don’t know |  |
| Q202K | Any foods made from beans, peas, lentil, or nuts? | 0. No  1.Yes  99.Don’t know |  |
| Q202L | Any cheese, yogurt, milk or other milk products? | 1.Yes  2.No  99.Don’t know |  |
| Q202M | Any food made with oil, fat, or butter? | 0. No  1.Yes  99.Don’t know |  |
| Q202N | Any sugar or honey? | 0. No  1.Yes  99.Don’t know |  |
| Q202O | Any other foods, such as spice (black paper, salt) condiments, soft drink, coffee, or tea? | 0. No  1.Yes  99.Don’t know |  |
| Q203 | In the past four weeks, did you worry that your household would not have enough food? | 0. No  1. Yes  99.Don’t know | Go To Q205 |
| Q204 | If Q203 is YES, How did this happen? | 1.Rarely (once or twice in the past four weeks)  2. sometimes (three to ten times in the past four weeks)  3. often (more than ten times in the past four weeks) |  |
| Q205 | In the past four weeks, Do you or any household member not able to eat the kinds of foods you preferred because of a lack of resources? | 0. No  1. Yes  99.Don’t know | Go To Q207 |
| Q206 | If Q205 is YES, How often this happen? | 1.Rarely (once or twice in the past four weeks)  2. sometimes (three to ten times in the past four weeks)  3. often (more than ten times in the past four weeks) |  |
| Q207 | In the past four weeks, did you or any household member have to eat a limited variety of foods due to a lack of resources? | 0. No  1.Yes  99.Don’t know | Go To Q209 |
| Q208 | If Q207 is YES, How often this happen? | 1.Rarely (once or twice in the past four weeks)  2. sometimes (three to ten times in the past four weeks)  3. Often (more than ten times in the past four weeks) |  |
| Q209 | In the past four weeks, did you or any household member have to eat some foods that you really did not want to eat due to lack of resources to obtain type of food? | 0. No  1. Yes  99.Don’t know | Go To Q211 |
| Q210 | If Q209 is YES, How often this happen? | 1.Rarely (once or twice in the past four weeks)  2. sometimes (three to ten times in the past four weeks)  3. often (more than ten times in the past four weeks) |  |
| Q211 | In the past four weeks, did you or any household member have to eat a smaller meal than you felt you needed due to lack of enough food? | 0. No  1. Yes  99.Don’t know | Go To Q213 |
| Q212 | If Q2012 is YES, How often this happen? | 1.Rarely (once or twice in the past four weeks)  2. sometimes (three to ten times in the past four weeks)  3. often (more than ten times in the past four weeks) |  |
| Q213 | In the past four weeks, did you or any household member have to eat fewer meals in a day due to lack of enough food? | 0. No  1. Yes  99.Don’t know | Go To Q215 |
| Q214 | If Q2013 is YES, How often this happen? | 1.Rarely (once or twice in the past four weeks)  2. sometimes (three to ten times in the past four weeks)  3. often (more than ten times in the past four weeks) |  |
| Q215 | In the past four weeks, Was there no food to eat of any kind in your household because of lack of resources to get food? | 0. No  1. Yes  99.Don’t know | Go To Q217 |
| Q216 | If Q2015 is YES, How often this happen? | 1.Rarely (once or twice in the past four weeks)  2. sometimes (three to ten times in the past four weeks)  3. often (more than ten times in the past four weeks) |  |
| Q217 | In the past four weeks, did you or any household member go to sleep at night hungry because there was not enough food? | 0. No  1. Yes  99.Don’t know | Go To Q219 |
| Q218 | If Q2017 is YES, How often this happen? | 1.Rarely (once or twice in the past four weeks)  2. sometimes (three to ten times in the past four weeks)  3. often (more than ten times in the past four weeks) |  |
| Q219 | In the past four weeks, did you any household member a whole day and night without eating due to lack of enough food? | 0. No  1. Yes  99.Don’t know | Go To Q221 |
| Q220 | If Q2019 is YES, How often this happen? | 1.Rarely (once or twice in the past four weeks)  2. sometimes (three to ten times in the past four weeks)  3. often (more than ten times in the past four weeks) |  |
| Q221 | In the past four weeks, how did you manage to cope with food insufficient? | |  |
| Q221A | Trust on less preferred food | 0. No  1. Yes  99.Don’t know |  |
| Q221B | Limit portion size at meal time | 0. No  1. Yes  99.Don’t know |  |
| Q221C | Reducing the number of meals eaten per day | 0. No  1. Yes  99.Don’t know |  |
| Q221D | Borrow food or rely on help for friend or relative | 0. No  1. Yes  99.Don’t know |  |
| Q221E | Purchase food on credit | 0. No  1. Yes  99.Don’t know |  |
| Q221F | Begging for money or food | 0. No  1. Yes  99.Don’t know |  |
| Q221G | Selling essential assets like land, house.. | 0. No  1. Yes  99.Don’t know |  |
| Q221H | Having sex for money | 0. No  1. Yes  99.Don’t know |  |
| Q221I | Doing hard works | 0. No  1. Yes  99.Don’t know |  |
| **Q301** | **Questions** | **Coding Categories** | **Skip** |
| Q301 | Did you miss taking any of your ART drugs: | |  |
| Q301A | Yesterday? | 0. No  1. Yes  99.Don’t know |  |
| Q301B | In the last 30 days? | 0. No  1. Yes  99.Don’t know |  |
| Q302 | Does any of your medication have special instruction, such as” take with food”, or “on an empty stomach” or “with plenty of fluids?” | . No  1. Yes  99.Don’t know | Go To Q304 |
| Q303 | If YES to Q302, how often did you follow those special instructions over the last four days? | 1. All the time  2. Most of the time  3. About half of the time  4. Some of the time  5.Never 99.Don’t know |  |
| Q304 | What caused you to miss doses of ART medication? (Multiple response possible) | 1.Had no food to take with medication  2.Away from home  3.Busy with other thing  4.Simply forget  5. Want avoid side effect.  6. other specify_______ |  |

THANK YOU!!!

Data collector:

Date of interview: (dd/mm/yyyy)_____/_______/__________

Name of Interviewer____________________________
